# Supplementary material for: An errors-in-variables extreme-value model for estimating interpolated extreme streamflows at ungauged river sections
Source: Copernicus journal article supplement (doi:10.5194/egusphere-2024-2114), 2024-08-05
Supplement: Supplementary file [file egusphere-2024-2114-AC1-supplement.pdf]

# EGUSPHERE-2024-2114

## Detailed responses to Reviewer 1's comments

Duy Anh Alexandre & Jonathan Jalbert

November 5, 2024

First, we would like to thank the reviewer who conducted a thorough review and provided relevant comments and suggestions. Due to its feedback and suggestions, we notably changed the model description in Section 3. The modifications in the revised version of the manuscript are highlighted in blue. Below are detailed responses to all of Reviewer 1's comments.

Reviewer 1 and Reviewer 2 suggest the use of observed discharges data to validate the results. However, it is not possible to validate the results as the reviewers suggest. The estimated discharges are obtained with a technique combining hydrologic models, interpolation and data assimilation. So, at the river sections where there is true observations, these observations are assimilated. So the real data cannot be used to validate in a strict senses the estimated discharges.

Estimated discharges at gauged sections still contain some uncertainty, primarily due to rating curve uncertainty when estimating discharges from water level measurements, especially for high discharge values. At ungauged sites, this uncertainty is greater and increases with the river distance from a gauging station. These sources of uncertainty affect the precision of return level estimates. In the manuscript, we aimed to show these impacts of uncertainty on return level estimations for both gauged and ungauged sections. To further emphasize this point in the revised version, we added Section 4.5 to analyze a gauged river section. This new analysis is twofold: first, it demonstrates the flexibility of the proposed approach to model uncertainty, and second, it shows the impact of including interpolation uncertainty in the return level estimates.

It would have been interesting to perform a cross-validation where real observations from a river section were withheld from assimilation, allowing us to compare the estimated return levels with the actual data and the estimated discharges. However, such cross-validation data is not available.

That being said, the estimated discharges were already evaluated at sites with observations in Lachance-Cloutier *et al.* (2017), but the emphasis was not on annual maxima.

### Summary

The manuscript *An errors-in-variables extreme-value model for estimating interpolated extreme streamflows at ungauged river sections* by Duy Anh Alexandre and Jonathan Jalbert presents an interesting model with a slightly less traditional application in the realm of extreme value analysis. They focus on deriving information on extremes when these are not observed, employing information from hydrological models outputs and employing an errors-in-variables (EIV) approach.

The modeling approach is interesting and novel (as far as I know), but I do have concerns about the writing of both the text and the mathematical details, which I think make the manuscript not as clear as it should be and make me doubtful of the validity of the results.

Overall I think the manuscript presents an interesting approach but I would recommend the authors spend some time in re-reading the manuscript and in making sure the mathematical details

follow logically and are written clearly and with precision.

Thank you for your comment, which will help new readers understand our proposed approach. We thoroughly proofread the mathematical details to avoid typos and enhance clarity.

## Some more punctual comments:

1. If I understand correctly there is no observed data used in any part of the model, but you use the simulated/estimated data (you use both terms, I think you mean the same thing) to derive the hypothetical/imputed annual maxima across the whole river network. Were the hydrological models not calibrated on something? Is there not any observed flow data that you can use to validate your modeling approach?

It is correct that no observed data has been used in this model. Calibration and validation of the hydrological model's estimated discharges with observations were previously conducted by Lachance-Cloutier *et al.* (2017). The goal of this paper was to incorporate discharge uncertainty into the extreme value analysis. If no uncertainty is assumed at observed sites, a classical extreme value model can be used.

We now use consistently *estimated discharges* in the revised version of the manuscript.

2. More importantly, you are modeling annual maxima: do you extract for each of the 6 model configurations a value for the year based on the maximum value of  $\eta_{ij}$ : do you have any way to ensure that you are modeling the flow value of the same day (and does it matter?)

To extract the streamflow annual maxima for configuration  $i$ , we identify the maximum value  $\max_{1 \leq k \leq 365} \eta_{ijk}$ , where  $\eta_{ijk}$  represents the location of the log-discharge distribution for configuration  $i$ , year  $j$ , and day  $k$ . The index  $k$ , which corresponds to the day on which the annual maxima occur, can differ for each configuration  $i$  in a given year  $j$ , as no constraint was imposed. The rationale behind this approach is that annual maxima for a given year might not coincide across all hydrological configurations, though such short lags are not important for our purposes. We verified that the annual maxima were selected from the same period, with possible separation of only a few days. Our aim was to avoid retrieving a mix of Fall and Spring maxima within a given year at a river section.

We added this clarification in the revised version of the manuscript.

3. In Section 3.2 you use  $Y_i$  to indicate the maxima in year  $i$ , but then in 3.3 you use  $Y_j$ , with  $j$  indexing the year, but you also have the eta and zeta parameters indexed by  $i, j$ , where now  $i$  indicates the hydrological model? This is quite confusing.

You are right. This is an artifact from our working version of the manuscript. We now consistently use the index  $i$  for the hydrological model configuration and  $j$  for the year throughout the manuscript.

4. In Equation 6: should the logNormal not be for  $X_{ij}$  - there is some unclarity in the notation here (the pendix of the  $f$  should it not be big  $Y$ , we normally give distributions for r.v, not for realizations - indeed you do so in Eq. 7)?

Thank you for pointing that out. The first  $Y_j$  in Eq. 6 should indeed be capitalized. Following Point 8 of your review, we have decided to adopt a more traditional presentation of the model. We hope the distinction between random variables, realizations, and modeling assumptions is now clearer in Section 3.1 and 3.2 of the revised version of the manuscript.

5. Line 178 "contributes to the distribution of  $Y_j$ "  $\rightarrow Y_i$ ? The idea is that in any year each  $j$ th model contributes differently .

Yes, this is the idea. Each configuration distribution  $\{(\eta_{ij}, \zeta_{ij}) : 1 \leq i \leq 6\}$  contributes *equally* to the distribution of the unobserved true discharge  $Y_j$ , but configurations with a larger logarithm of scale  $\zeta_{ij}$  are less informative than configurations with a smaller  $\zeta_{ij}$ . We have added clarifications in the revised version of the manuscript.

6. Is Section 3.3 not assuming in some way that (conditional) uncertainty of the maximum distribution is independent of the size of the maximum? It is often the case that hydrological models are more uncertain for extremes (where the data available for calibration is more scarce): is this something that could undermine your approach?

Uncertainty is indeed dependent on the size of the estimated discharge. Average log-discharges have a smaller  $\zeta_{ij}$  than annual maxima. Our proposed model accounts for this uncertainty, and it does not undermine the approach.

7. What is the  $\sigma$  which appears in equation 8 (and what value did you choose for this hyperparameter)? From the results it looks like you greatly reduce the uncertainty of the estimated maximum: could this be linked to fairly informative priors?

The parameter  $\sigma$  corresponds to the scale of the GEV distribution. The GEV distribution modeling the unobserved log-maxima has three parameters: location  $\mu$ , scale  $\sigma$ , and shape  $\xi$ . We did not assign any fixed values to these three parameters; they are model parameters that need to be estimated. We assigned an improper prior to  $\sigma$  for Bayesian inference. Conceptually, if the true discharge annual maxima were known, the GEV parameters could be estimated using this series. In our framework, however, the true discharges are not observed, and we incorporate the associated uncertainty into the GEV parameter estimation through Eq. 8.

8. Personally I find the derivation in Section 3.5 slightly easier to follow, probably because it is closer to the traditional EIV derivation. It's OK to leave this at a later stage of the manuscript, but it is not at all clear how the two derivations are equivalent, considering the final equation has a different form (the pendants for  $f$  are different, how is this equivalent?) Also as it is the equation at line 219 is hard to parse since  $\eta_i$  represents both the random variable and its realization (similarly the equation at line 215 would normally be written using the  $\sim$  formulation and making clear what is a random variable and what is a realization).

The derivation in Section 3.5 has now been adopted in response to your comment. It is now Section 3.1 and 3.2 in the revised version. Since it appears earlier in the revised manuscript, we have added more details to clarify the conditional distributions, random variables, and their realizations. We hope these changes improve clarity.

9. Section 4.3: is it surprising that MCMC samples from what you have assumed to be GEV-distributed are GEV-distributed? The real test here would be to have the measured flow values and see if the qq-plot of those values behaves like a GEV.

It is not surprising, but it does provide some validation of the model's adequacy. The latent variables, the true unobserved discharge annual maxima, are estimated in conjunction with the GEV on one side and the distribution of the estimated discharges on the other. It is reassuring that the fitted GEV is able to model the latent series of annual maxima. This might not have been the case if the series of estimated discharge distributions were inconsistent with a single GEV distribution, which would have resulted in a poor fit.

10. Section 5.1: you provide only one value of DIC per model: did you try this across the whole river network?

This question led us to further analyze non-stationarity, and we added Section 3.5 dedicated to non-stationary extensions. In response, we found that 100 out of the 211 river sections exhibit non-stationarity in the GEV location parameter modeling the annual discharge maxima. We now describe and discuss these new results in the revised version of the manuscript.

These further analyses led us to realize that the DIC favored the stationary model, while the 95% posterior marginal confidence interval for  $\mu_1$  did not include 0. At this point, we are unsure why the DIC might be over-penalizing non-stationary models. It may be related to the fact that the maxima are treated as missing values in the model. Perhaps another criterion, such as the Watanabe–Akaike information criterion, would be more suitable in our case. Nonetheless, the non-stationarity is now described in the manuscript using the marginal posterior distribution of the non-stationary parameters.

11. The study would be even more convincing if it could show that the approach does indeed work as planned on simulated dataset. Since you do not use any observed data we can not really know if the new maps which have been derived are more reliable than what was there before.

The maps are more robust because the genuine uncertainty of estimated discharges is included in the statistical model. Moreover, all the available sources of information have been also included in the proposed Bayesian hierarchical model, namely the six hydrologic model configurations.

In Section 4.4, we provided the 100-year return level using a simpler approach that ignores the uncertainty of estimated discharges and utilizes the available information less efficiently. While the difference between the point estimates is relatively small, the proposed approach accounts for uncertainty and provides it for the return level estimates. There is no straightforward way to estimate such uncertainty using the simpler method.

Comments about this point have been added in Section 4.4.

## Minor comments

- Line 26: a positive value “suggests” → it’s a mathematical fact, so make indicates, implies, results in...

Done. Thank you for the pointing that out.

- Line 29-30 “assuming climate stationarity”: the definition does not require stationarity, the stationarity is needed to be able to define the return period as the quantile. See on this Volpi et al. (2015) and Salas et al. (2013).

Thank you for the clarification. We have added it along with your suggested references.

- Line 114: at <https://github.com/jojojal5/Publications> I don’t see the code for this paper yet.

It is now available.

- The title of Section 3.1 is not very informative

We changed it to *True discharges as the model’s missing values*. We hope that it is now more informative.

- In some equations (eg 6 and 9) the summation goes up to S, should this be a 6 (or should all the other summations go up to 6 and you should define what S is)

It has been fixed throughout the revised version of the manuscript. Thank you for pointing that out.

- After Eq. 5: the function is evaluated at  $y_i$ , not  $y$  (even if I would suggest to change Eq. 5 so that the function is evaluated at a  $y$ , rather than  $y_i$  value for clarity)

It has been taken into account in the new Section 3.1 and 3.2.

- I don't see why the mixture model in equation 9 would be a sensible idea for this.  
According to your comment, we removed this section in favor of another one that provides alternative options.
